# Supplementary material
Source: publisher figshare collection journal article supplement (https://gsajournals.figshare.com/ndownloader/files/18900890)
Supplement: Supplementary file 1 [file 18900890]

## Sheet: Sheet1
Table S8. Yeast rDNA copy number estimates for diploid strains by CHEF gel
Strain	SRA Number	WGS*	CHEF gel
Diploid
AFC	ERR1309327	20.2476	58.0041
AAC	ERR1309038	30.1759	61.4986
BGD	ERR1309432	40.3057	45.0742
ARL	ERR1309170	46.9844	71.4478
CER	ERR1308780	71.0198	91.228
ANV	ERR1308740	77.244	80.239
SACE_GAS	ERR049929	94.6972	94.5247
BII	ERR1308846	119.129	123
SACE_GAL	ERR023701	118.293	111.008
CMF	ERR1308700	230.756	111.008
CEK	ERR1309167	242.883	127.492
SACE_GAV	ERR023702	253.912	292.327
*GCC-analyzed from WGS data Peter et al., 2018 Nature
